# Supplementary material for: Simultaneous organic carbon, nutrients removal and energy production in a photomicrobial fuel cell (PFC)
Source: Royal Society of Chemistry journal article supplement (doi:10.1039/c1ee02089g), 2011-01-01
Supplement: c1ee02089g.pdf [file c1ee02089g.pdf]

**Submission to Energy & Environmental Science**

Page: 6; Figure: 2; Table: 2.

## **Supplementary Information**

# Simultaneous organic carbon, nutrients removal and energy production in a photomicrobial fuel cell (PFC)

*Yifeng Zhang, Jafar Safa, Irini Angelidaki\**

Department of Environmental Engineering, Technical University of Denmark, DK-2800 Lyngby,  
Denmark

---

\*Corresponding author, Tel.: +45 45251429; fax: +45 45932850.

E-mail address: iria@env.dtu.dk (Irini Angelidaki)

The following is included as additional supporting materials for this paper:

Page S3 **Figure S1. Algae concentration versus optical density (OD) at 658 nm (*C. vulgaris*) in synthetic wastewater.**

Page S4 **Figure S2. DO and pH change with time.**

Page S5 **Table S1. Sediment characteristics of Bagsvaerd Lake**

Page S6 **Table S2. DGGE 16S rDNA band identifications**

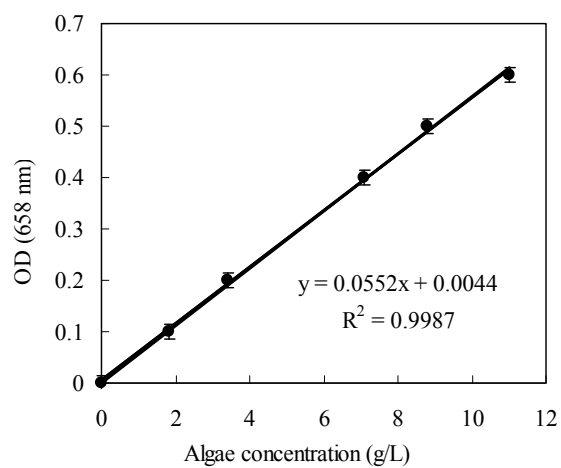

Figure S1. Algae concentration versus optical density (OD) at 658 nm (*C. vulgaris*) in synthetic wastewater.

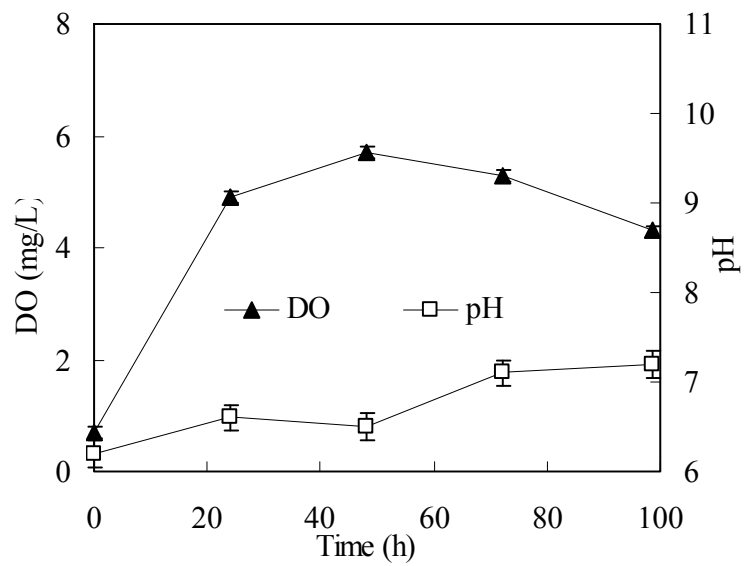

Figure S2. DO and pH change with time

Table S1. Sediment characteristics of Bagsvaerd Lake

| Characteristics  | Measured values  |
|------------------|------------------|
| pH               | 6.5±0.1          |
| Conductivity     | 495±10 ms/cm     |
| Water content    | 25.0±0.2%        |
| Organic content  | 17.5±0.3%        |
| Total nitrogen   | 0.030±0.002 mg/g |
| Total phosphorus | 0.011±0.001 mg/g |

Table S2. DGGE 16S rDNA band identifications

| Band | Sampling site <sup>a</sup> |   |   |                | Genbank<br>accession no. | Closest relatives<br>(%Sequence similarity <sup>d</sup> ) | Class <sup>c</sup>         |
|------|----------------------------|---|---|----------------|--------------------------|-----------------------------------------------------------|----------------------------|
|      | A                          | B | C | D              |                          |                                                           |                            |
| 1    |                            |   |   | • <sup>b</sup> | JF979184                 | Uncultured bacterium oca1 (96%)                           | <i>Alphaproteobacteria</i> |
| 2    | •                          | • | • |                | JF979185                 | Bacterium PE03-7G27 (99%)                                 | <i>Gammaproteobacteria</i> |
| 3    | •                          | • | • | •              | JF979186                 | Uncultured bacterium 4D3-5 (98%)                          | <i>Alphaproteobacteria</i> |
| 4    | •                          | • | • | •              | JF979187                 | <i>Bradyrhizobium japonicum</i> 2M (99%)                  | <i>Alphaproteobacteria</i> |
| 5    | •                          | • |   |                | JF979188                 | Uncultured <i>Flavobacterium</i> sp. clone OHW4 (99%)     | <i>Flavobacteria</i>       |
| 6    | •                          |   |   |                | JF979189                 | Uncultured bacterium clone CJRA42 (95%)                   | <i>Flavobacteria</i>       |
| 7    |                            |   | • |                | JF979190                 | <i>Terrimonas ferruginea</i> CL-9.09b (98%)               | <i>Sphingobacteria</i>     |
| 8    |                            | • | • |                | JF979191                 | Uncultured <i>Rhodoferrax</i> sp. FL_51 (98%)             | <i>Betaproteobacteria</i>  |
| 9    | •                          | • | • | •              | JF979192                 | Uncultured bacterium R3B-14 (97%)                         | <i>Flavobacteria</i>       |
| 10   | •                          | • |   | •              | JF979193                 | Uncultured bacterium clone BACd-6E3 (100%)                | <i>Sphingobacteria</i>     |
| 11   |                            | • |   | •              | JF979194                 | <i>Rhizobium</i> sp. AL9.3 (99%)                          | <i>Alphaproteobacteria</i> |
| 12   | •                          | • | • | •              | JF979195                 | Denitrifying bacterium W73c (100%)                        | <i>Alphaproteobacteria</i> |
| 13   | •                          |   |   | •              | JF979196                 | Uncultured bacterium MIZ33 (99%)                          | <i>Alphaproteobacteria</i> |
| 14   |                            |   |   | •              | JF979197                 | <i>Alpha proteobacterium</i> D8-16 (99%)                  | <i>Alphaproteobacteria</i> |
| 15   | •                          | • | • |                | JF979188                 | Uncultured <i>Flavobacterium</i> sp. clone OHW4 (99%)     | <i>Flavobacteria</i>       |

<sup>a</sup> Sampling sites as shown in Figure S2.

<sup>b</sup> Existence under the condition

<sup>c</sup> The phylotypes were assigned to phyla based on Ribosomal Database Project II (RDP II) taxonomy classifications

<sup>d</sup> Percent values represent similarities between the associated DGGE band sequence and the closest match sequence from GenBank.
